# Supplementary material for: Binucleate Rhizoctonia Strain: A Potential Biocontrol Agent in Wheat Production
Source: MDPI journal article supplement (doi:10.3390/agronomy13020523), 2023-02-11
Supplement: s1 [file s1]

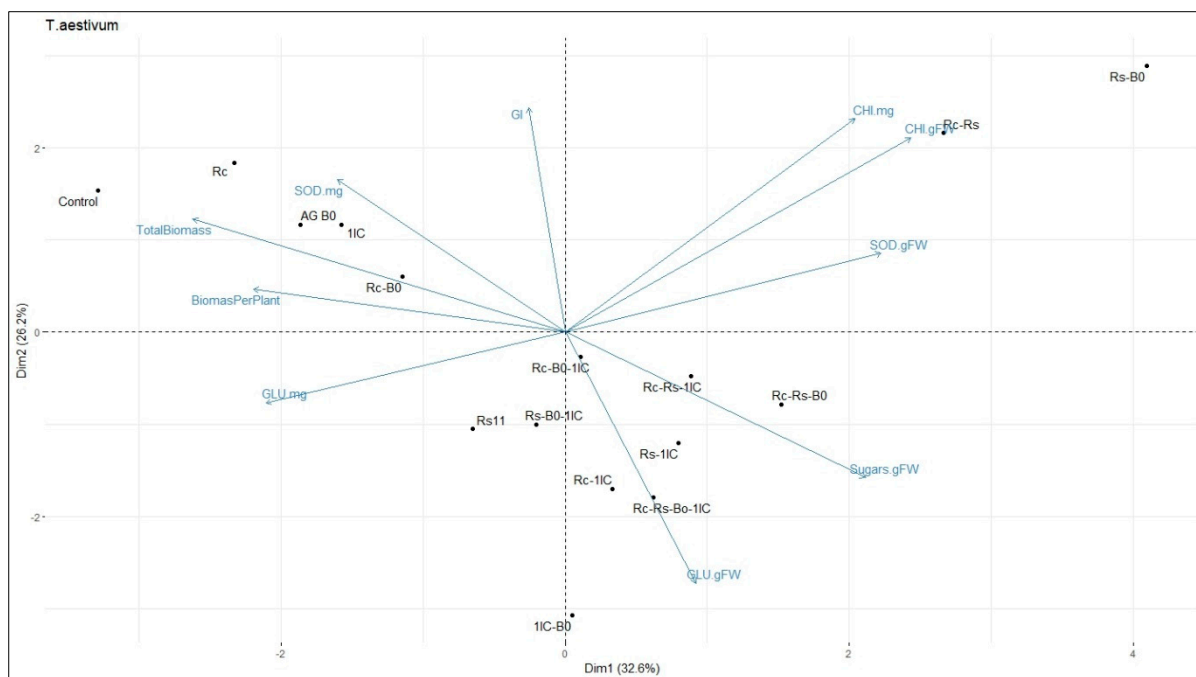

Figure S1. Principal component analysis (PCA) for *T. aestivum* during exposition to various test combinations.

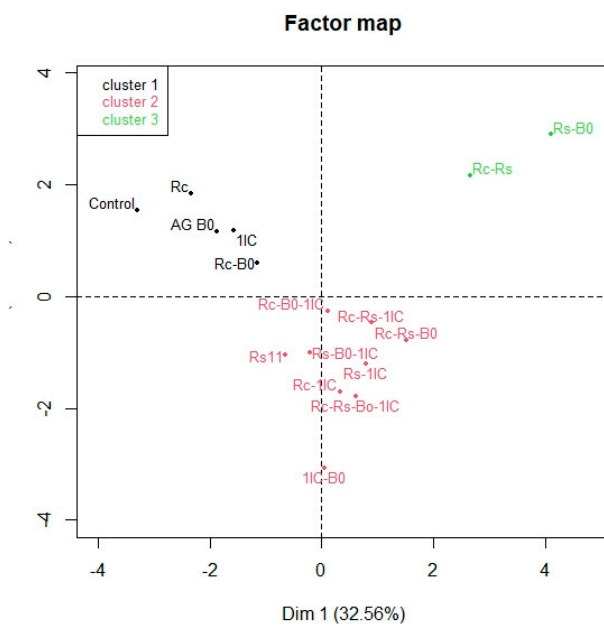

Figure S2. HCPC for *T. aestivum* during exposition to various test combinations.

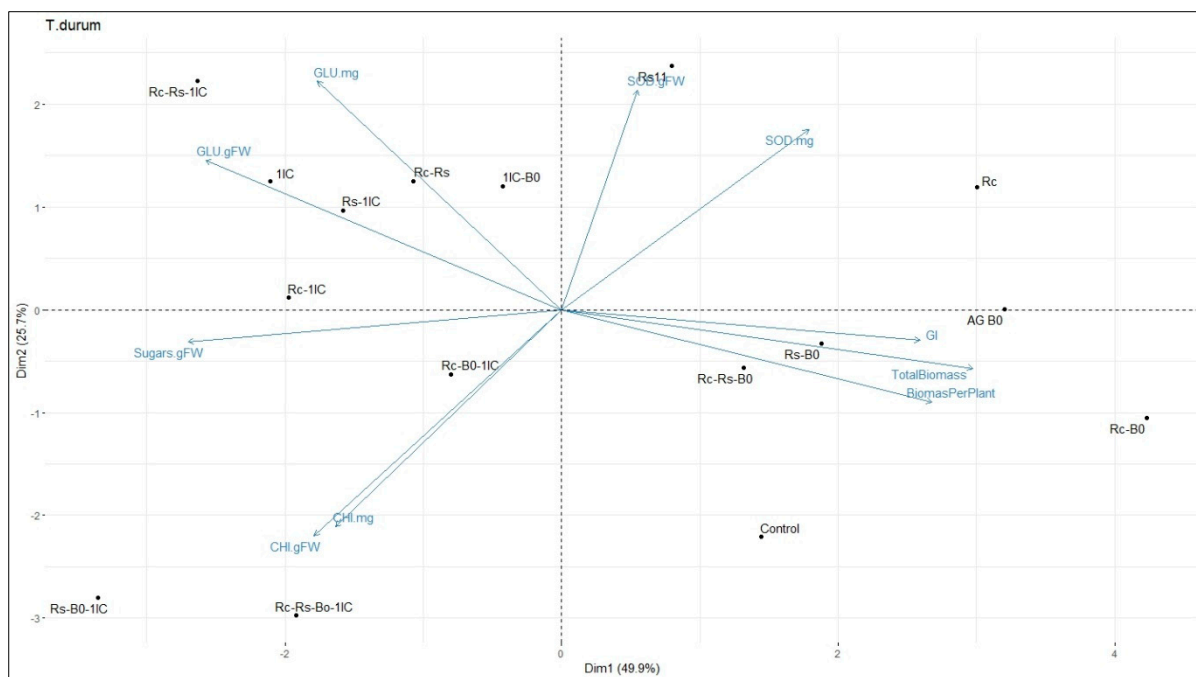

Figure S3. Principal component analysis (PCA) for *T. durum* during exposition to various test combinations.

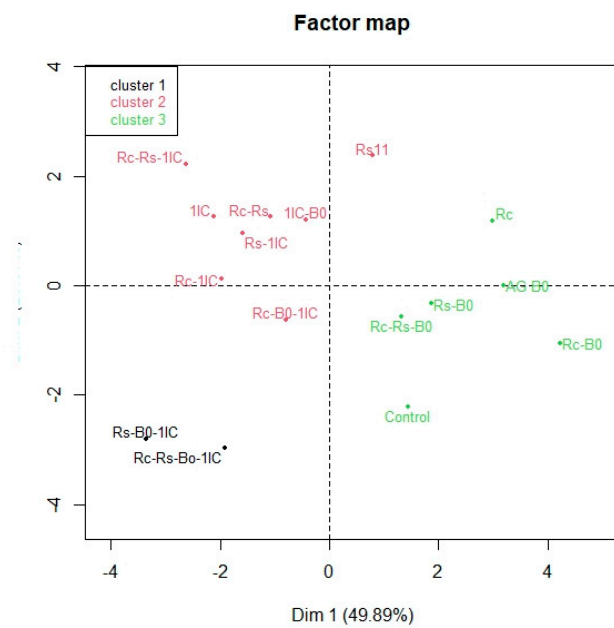

Figure S4. HCPC for *T. durum* during exposition to various test combinations.

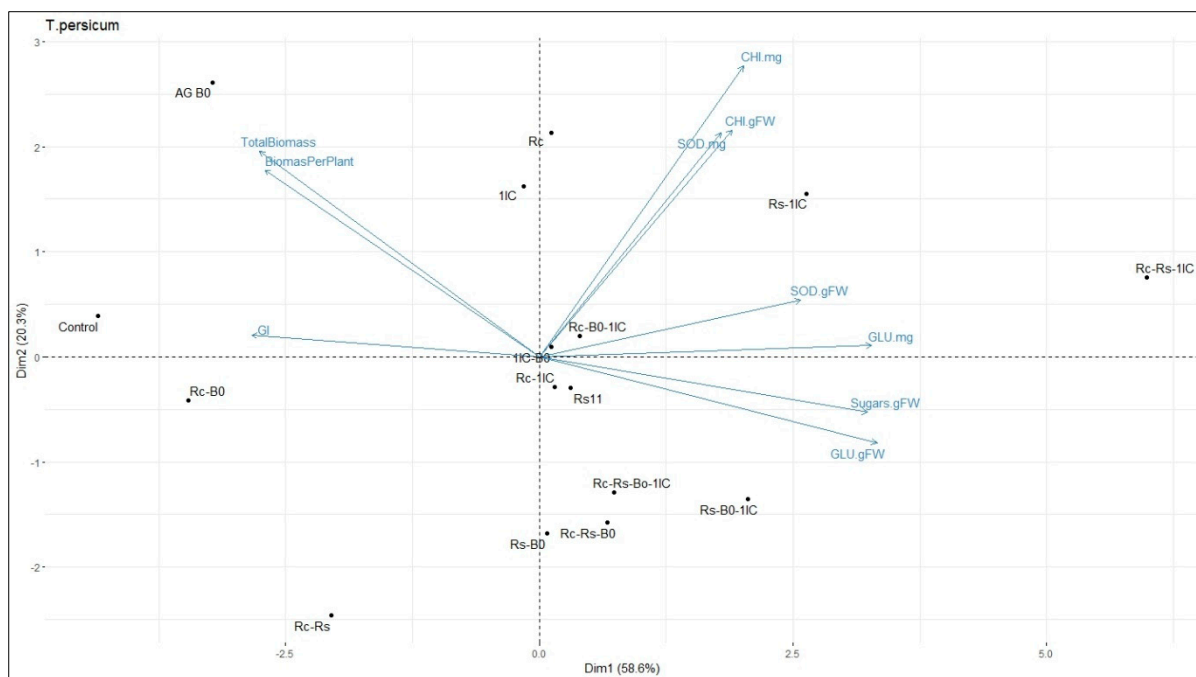

Figure S5. Principal component analysis (PCA) for *T. persicum* during exposition to various test combinations.

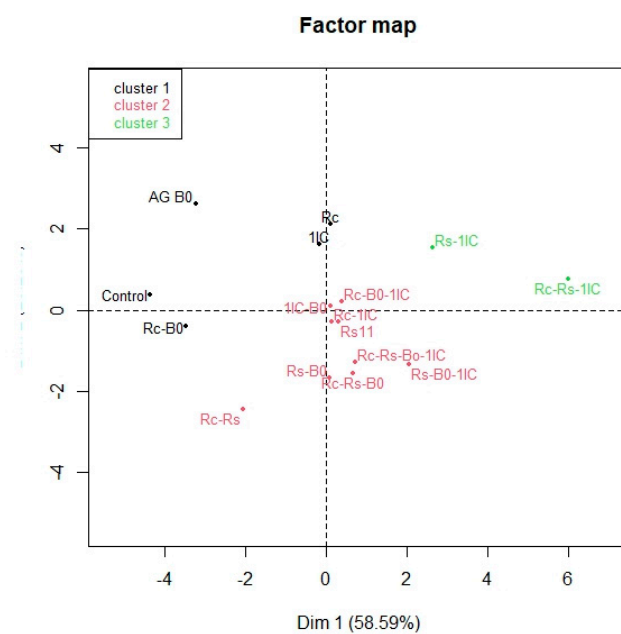

Figure S6. HCPC for *T. persicum* during exposition to various test combinations.

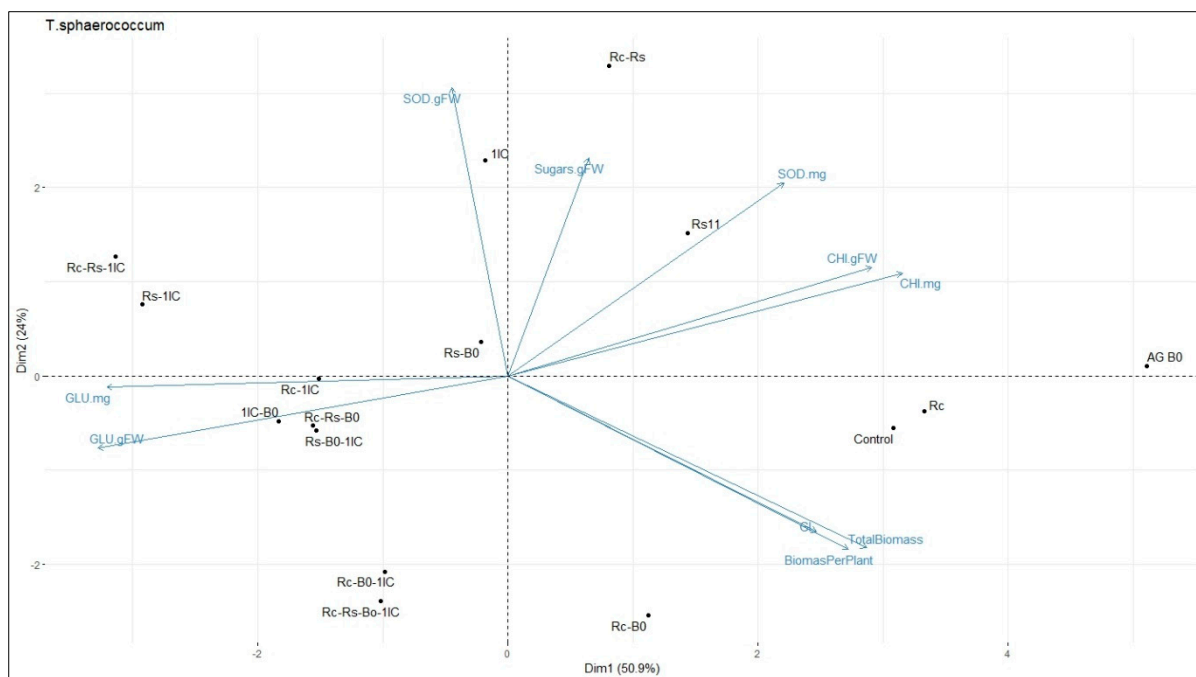

Figure S7. Principal component analysis (PCA) for *T. sphaerococcum* during exposition to various test combinations.

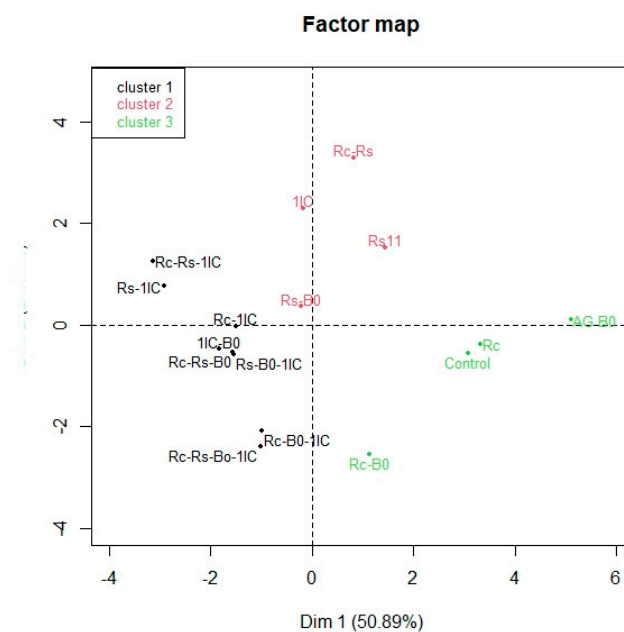

Figure S8. HCPC for *T. sphaerococcum* during exposition to various test combinations.

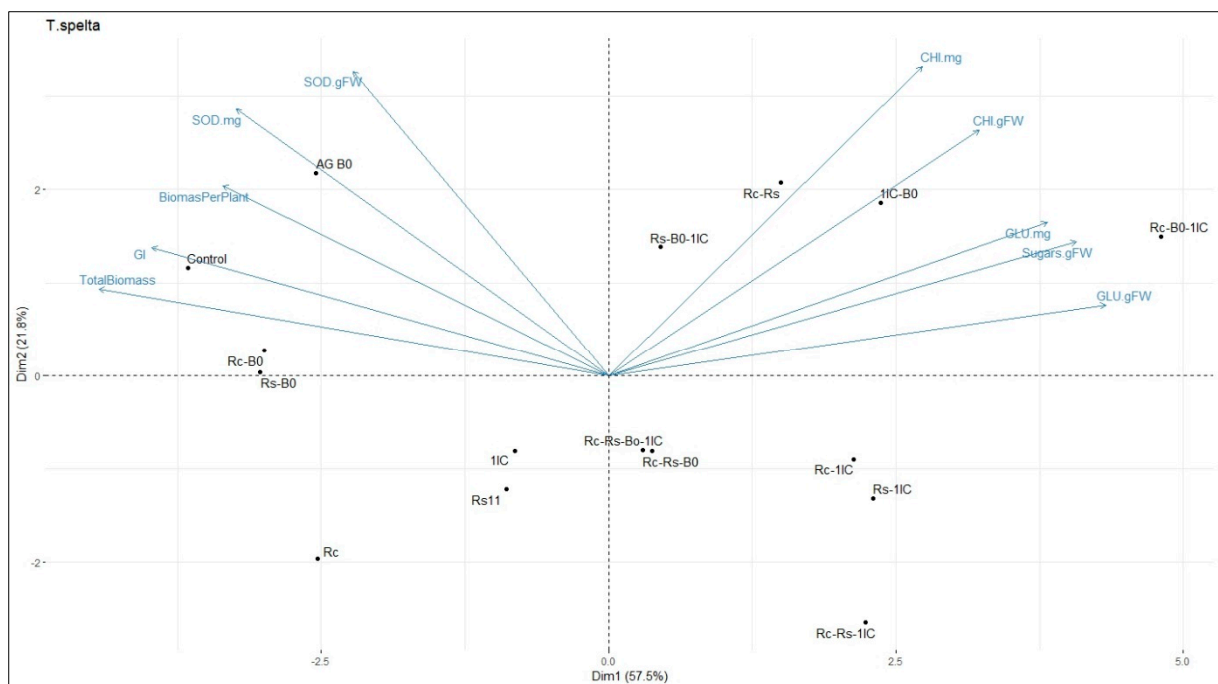

Figure S9. Principal component analysis (PCA) for *T. spelta* during exposition to various test combinations.

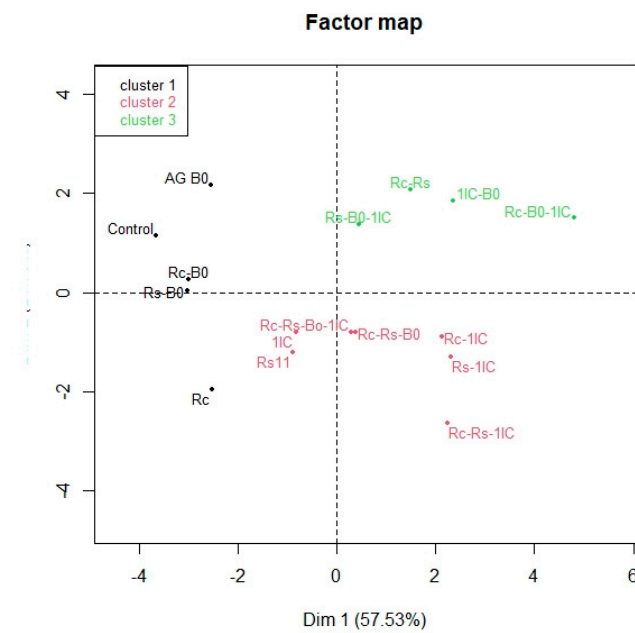

Figure S10. HCPC for *T. spelta* during exposition to various test combinations.
